# Supplementary material for: Network pharmacology and experimental methods to explore the mechanism of Poria extract in overcoming cisplatin-resistant ovarian cancer
Source: Research Square preprint supplement (doi:10.21203/rs.3.rs-8917089/v1), 2026-02-24
Supplement: Supplementary file 1 [file 4d8170e9d609824deb43a287.docx]

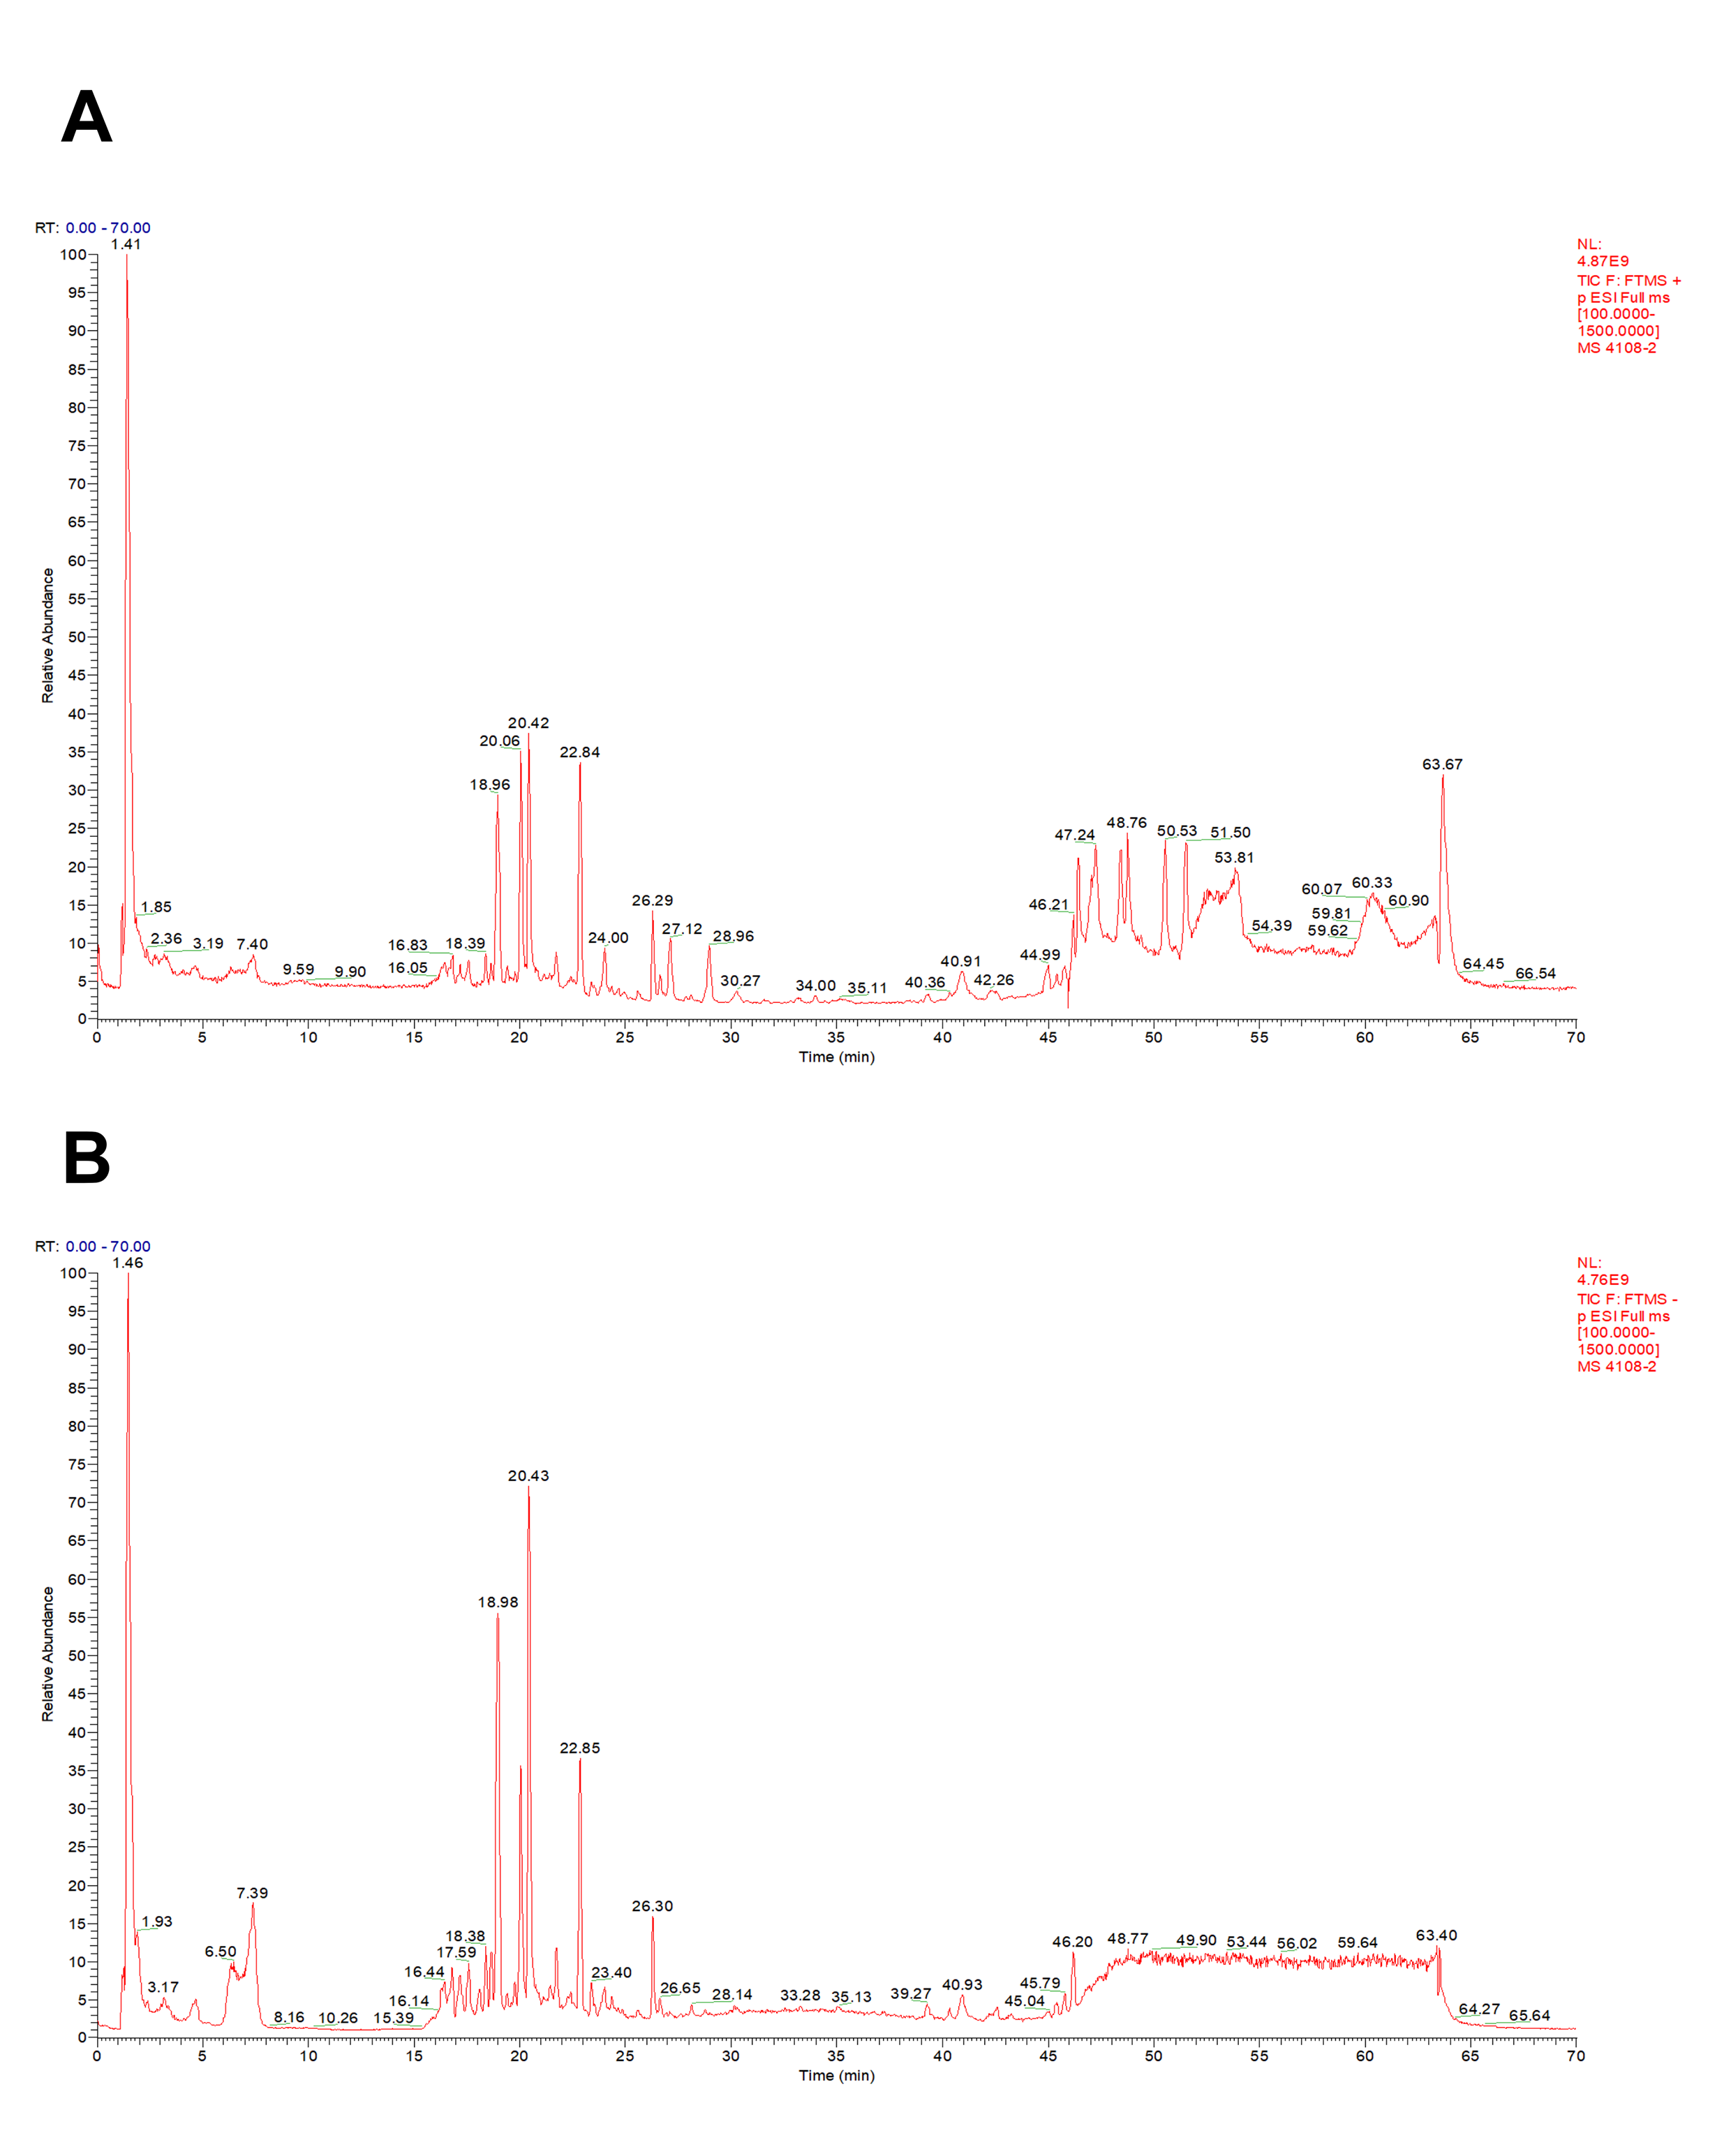


Supplementary figure 1. Poria chemical composition was determined by LC-MS/MS

**Supplementary Table 1 Chemical composition information of Poria**

| Name | Molecular Formula | Mass Deviation (ppm) | Molecular weight | Retention time (min) | Matching score | Peak area | Relative content (%) | Chemical formula |
| --- | --- | --- | --- | --- | --- | --- | --- | --- |
| Paeoniflorin | C23 H28 O11 | -1.24 | 480.16257 | 20.453 | 95 | 16964529909 | 18.769 | 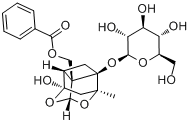 |
| Amygdalin | C20 H27 N O11 | -1.04 | 457.15793 | 18.98 | 92 | 16243272815 | 17.971 | 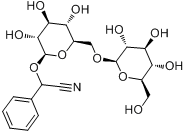 |
| Albiflorin | C23 H28 O11 | -0.98 | 480.16269 | 20.073 | 90.6 | 7406859492 | 8.195 | 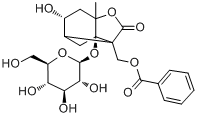 |
| Sucrose | C12 H22 O11 | -1.06 | 342.11585 | 1.538 | 93 | 5250208001 | 5.809 | 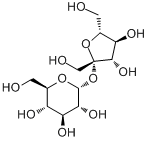 |
| Pyrogallol | C6 H6 O3 | -1.91 | 126.03145 | 7.387 | 78.2 | 5002810521 | 5.535 | 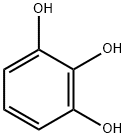 |
| Citric acid | C6 H8 O7 | -0.62 | 192.02688 | 1.637 | 88.8 | 4375690189 | 4.841 | 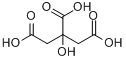 |
| Benzoyl paeoniflorin | C30 H32 O12 | -0.95 | 584.18882 | 26.315 | 94.8 | 2862092830 | 3.167 | 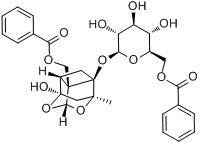 |
| Coumarin | C9 H6 O2 | -0.34 | 146.03673 | 24.04 | 85.5 | 2522063014 | 2.790 | 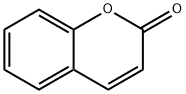 |
| Pachymic acid | C33 H52 O5 | -0.96 | 528.38097 | 46.207 | 88.8 | 2296343941 | 2.541 | 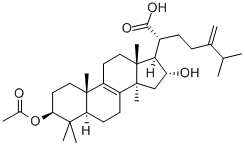 |
| Oxypaeoniflorin | C23 H28 O12 | -1.2 | 496.15748 | 18.679 | 91 | 2201121535 | 2.435 | 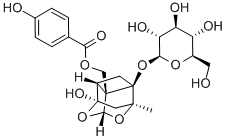 |
| Xanthoxyline | C10 H12 O4 | -0.65 | 196.07343 | 22.879 | 78.6 | 1796256850 | 1.987 | 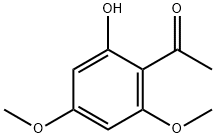 |
| 1,2,3,4,6-Pentagalloylglucose | C41 H32 O26 | -1.33 | 940.11693 | 24.066 | 92.2 | 1391808836 | 1.540 | 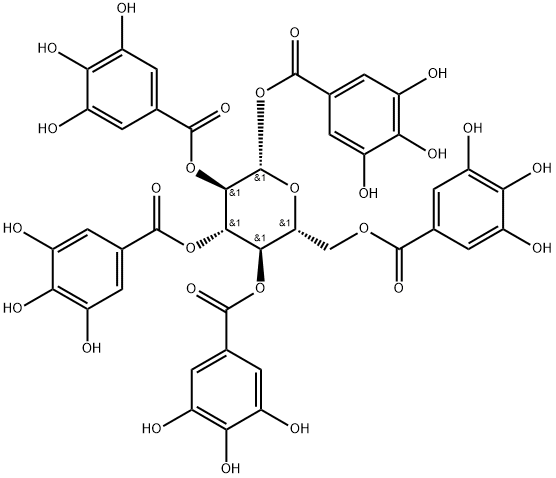 |
| 2-Pyrrolidinecarboxylic acid | C5 H9 N O2 | -0.02 | 115.06333 | 1.529 | 82.8 | 1280302707 | 1.417 | 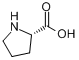 |
| 5-Hydroxymethylfurfural | C6 H6 O3 | -0.14 | 126.03168 | 1.47 | 81.5 | 1174344010 | 1.299 | 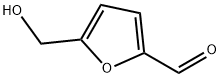 |
| Adenosine | C10 H13 N5 O4 | -0.78 | 267.09654 | 9.49 | 90.1 | 1002608539 | 1.109 | 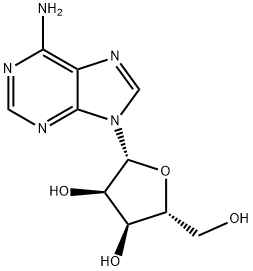 |
| L-Valine | C5 H11 N O2 | -0.37 | 117.07894 | 1.532 | 74.2 | 853038631.1 | 0.944 | 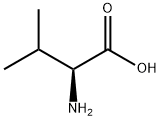 |
| Poricoic acid A | C31 H46 O5 | -0.86 | 498.33409 | 40.846 | 90.4 | 602135988.1 | 0.666 | 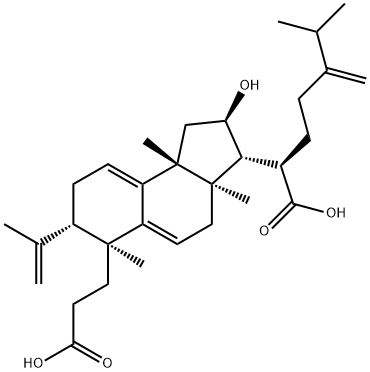 |
| 3-O-Acetyl-1α-hydroxytrametenolic acid | C32 H50 O5 | -1.12 | 514.36525 | 45.424 | 79.4 | 598630694.7 | 0.662 | 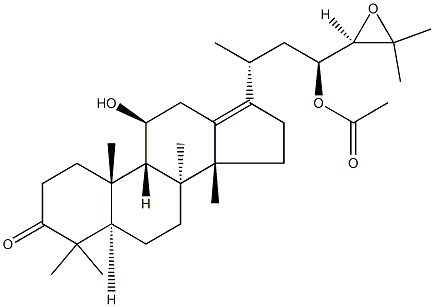 |
